# Supplementary material
Source: PubMed Central journal article supplement (PMC3877801)
Supplement: supp_tpc.113.113407_tpc113407_Supplemental_Data.pdf [file supp_tpc.113.113407_tpc113407_Supplemental_Data.pdf]

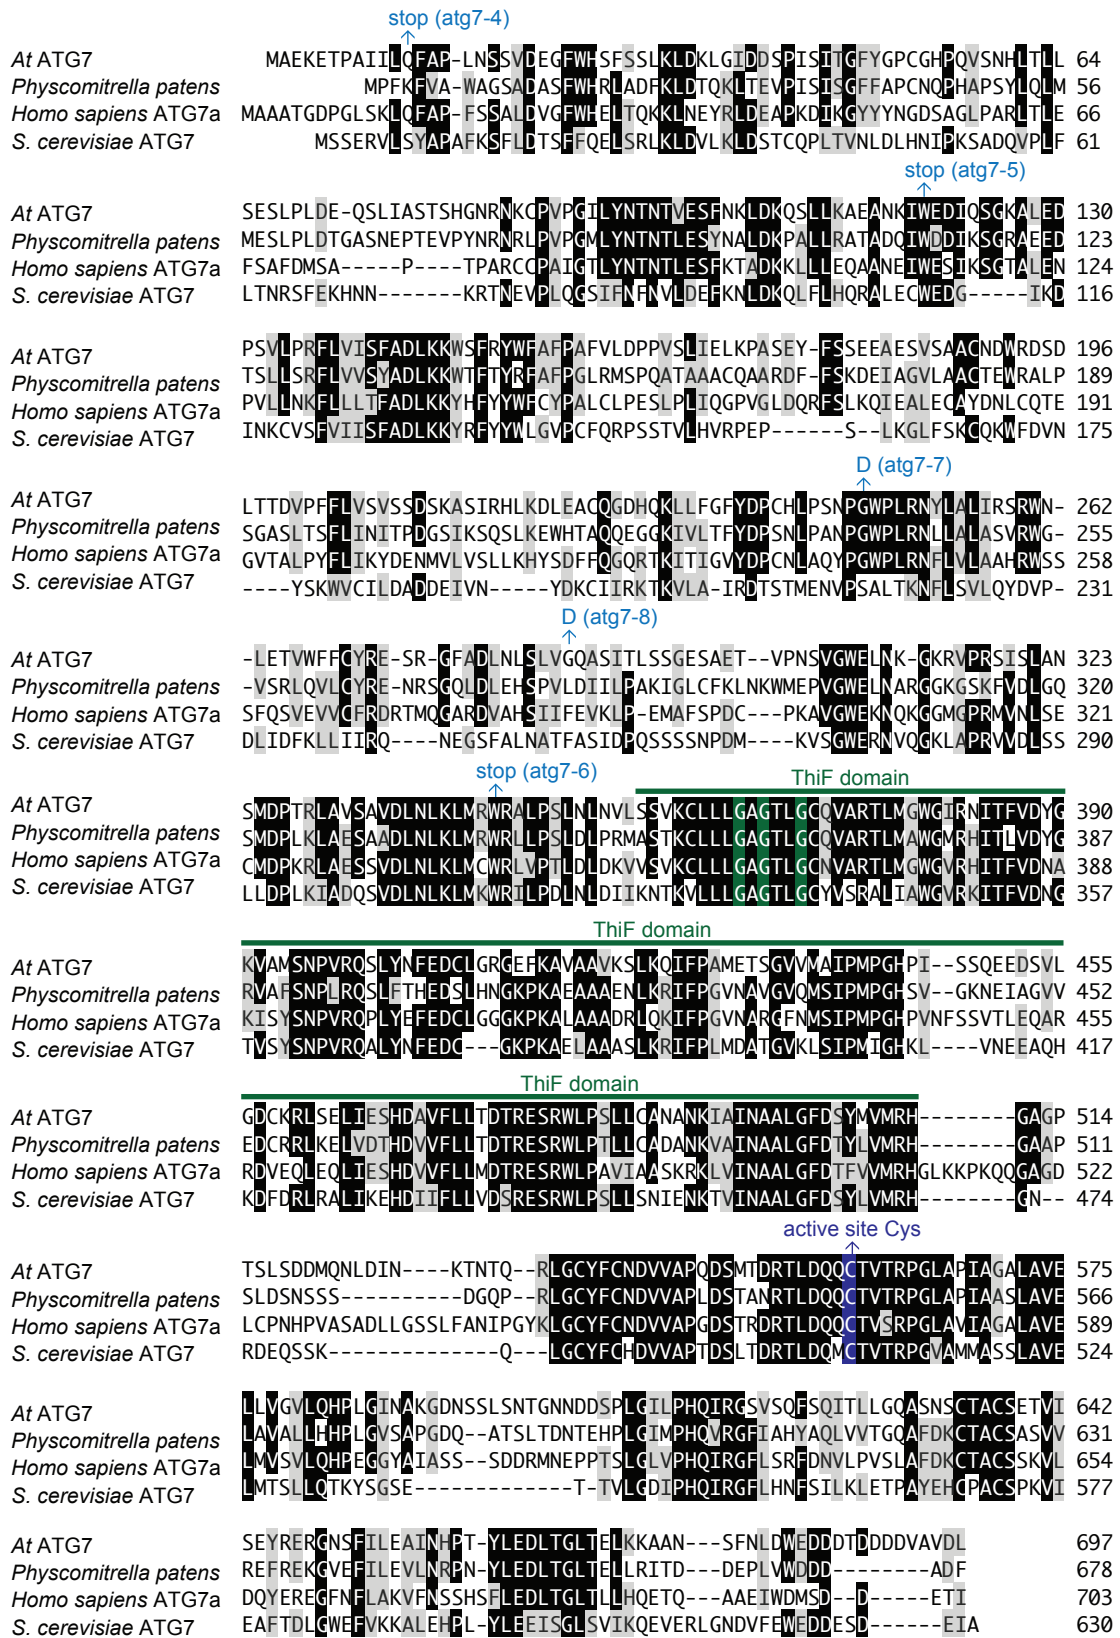

**Supplemental Figure 1.** Alignment of ATG7 proteins from various organisms. *Arabidopsis* (*At*) ATG7 was aligned with the corresponding proteins from moss (*Physcomitrella patens*; XP\_001765080.1), humans (*Homo sapiens*; NP\_006386.1), and yeast (*S. cerevisiae*; P38862.1). Amino acid residues identical in at least three sequences are boxed in black or colors; chemically similar residues are boxed in gray. The identified atg7 lesions, the ThiF domain (GXGXXG nucleotide-binding motif highlighted in green), and the active site Cys residue are shown above the alignment.

**Supplemental Table 1.** Primers Used for *ATG* Sequencing.

| Gene        | Amplicon Size (bp) | Primer Name (5' to 3' Sequence)                                                 |
|-------------|--------------------|---------------------------------------------------------------------------------|
| <i>ATG2</i> | 1089               | ATG2-1L (AACCTTCACGTCACCATCCCTTAG)<br>ATG2-2L (TGCAGCATTTCATCAACATCTCA)         |
| <i>ATG2</i> | 1037               | ATG2-3L (GCCAGCACCTCCGCCTCTA)<br>ATG2-4L (GATTGGTAACTCCTCATT)                   |
| <i>ATG2</i> | 1098               | ATG2-5L (TTTCATCTTTCATCACAATCTGGA)<br>ATG2-6L (AATGTGGTAGGGGGTAAACTCAAT)        |
| <i>ATG2</i> | 1068               | ATG2-7L (GCAGGGGGCAGTGGATTTTC)<br>ATG2-8L (AAGATTTGGGACAGACATAAG)               |
| <i>ATG2</i> | 1147               | ATG2-9L (TTCATTTGCTTCCACTTGCTATCC)<br>ATG2-10L (TTTGCCTGTTGAATGCTGTCC)          |
| <i>ATG2</i> | 1195               | ATG2-13L (AGGGCCGGGATACAACTTC)<br>ATG2-14L (TGCTTCTCATCTGCCATCATACTA)           |
| <i>ATG2</i> | 1119               | ATG2-15L (CCAGGTTACGGGTTCGCTTTAC)<br>ATG2-16L (AACAATGCCTTCTCAGTGC)             |
| <i>ATG2</i> | 1091               | ATG2-17L (CTCTAAAGCTGGTCTCGTCAC)<br>ATG2-18L (AAGTCAGGTTTAGTTTCTCAA)            |
| <i>ATG2</i> | 900                | ATG2-19L (TGCTACGCCCAAAGATCAAGACGAC)<br>ATG2-20L (CTAAAAGAAGATGCAGCTACCAGACAGG) |
| <i>ATG3</i> | 914                | ATG3-5 (GTATTACCAAACCTCCTCGTG)<br>ATG3-6 (ATGAAGATAATAGACAGTGA)                 |
| <i>ATG3</i> | 1020               | ATG3-7 (CGATACGATAAATTCTTCCTC)<br>ATG3-8 (CAAGTTGAATAAGAGATAAGTGAA)             |
| <i>ATG3</i> | 932                | ATG3-9 (CTGGCTACACATGGGAAACC)<br>ATG3-10 (GACGATCACAAAAATACTCTACAAG)            |
| <i>ATG7</i> | 1139               | ATG7-1 (TTGACTCTCCTCCATAATAA)<br>ATG7-2 (TCAGAAGAAACCGAAACCAAAAAG)              |
| <i>ATG7</i> | 1191               | ATG7-3 (GATTGGCGCGACTCAGA)<br>ATG7-4 (TTAACAAGAACACCGCATCAT)                    |
| <i>ATG7</i> | 1055               | ATG7-5 (GTTGCCATGTCTAATCCAGTCAGG)<br>ATG7-6 (GATTCTGCAGCGCAGTTTTCTAAG)          |
| <i>ATG7</i> | 844                | ATG7-7 (AGTCGGAGTCCTACAACACC)<br>ATG7-8 (GAATGGAGCTGCGTCAAC)                    |

**Supplemental Table 2.** PCR-based Markers Used for Mutant Genotyping.

| Mutant        | Restriction enzyme | Amplicon size (bp) |                | Primer Name (5' to 3' Sequence)                                                                  |
|---------------|--------------------|--------------------|----------------|--------------------------------------------------------------------------------------------------|
|               |                    | Wt                 | mutant         |                                                                                                  |
| <i>atg2-1</i> | –                  | none               | 200            | LB1-SALK (CAAACCAGCGTGGACCGCTTGCTGCAACTC)<br>ATG2-4 (TGCTACGCCCAAAGATCAAGACGAC)                  |
| <i>ATG2</i>   | –                  | 900                | none           | ATG2-4 (TGCTACGCCCAAAGATCAAGACGAC)<br>ATG2-5 (CTAAAAGAAGATGCAGCTACCAGACAGG)                      |
| <i>atg2-3</i> | <i>XmnI</i>        | 186                | 111, 75        | ATG2-1 (CTCTTATCTGTGTTCTCTTCTTGTTCCTAC)<br>ATG2-2 (TTACCAGAAGGAAGAAGCAAAGACC)                    |
| <i>atg2-4</i> | <i>MbolI</i>       | 136, 57            | 112, 57,<br>24 | ATG2-7 (GAGGAAATTCTGGGTGGTATGATGAC)<br>ATG2-8 (CTAGAATCATGCCAGTCAGAGCCAGAGTA)                    |
| <i>atg3-1</i> | <i>TaqI</i>        | 151                | 124, 27        | ATG3-TaqI* (TTGACACAATGGCTTTTACTTTTGATT <u>C</u> )<br>ATG3-12 (AATCAGAACTACAAAGCCAACAGAAATAAGC)  |
| <i>atg7-3</i> | –                  | none               | 350            | LB1-SAIL (GCCTTTTCAGAAATGGATAAATAGCCTTGCTTCC)<br>ATG7-5 (GTTGCCATGTCTAATCCAGTCAGG)               |
| <i>ATG7</i>   | –                  | 281                | none           | ATG7-5 (GTTGCCATGTCTAATCCAGTCAGG)<br>ATG7-23 (GTTGCCATGTCTAATCCAGTCAGG)                          |
| <i>atg7-4</i> | <i>TaqI</i>        | 112, 30            | 142            | ATG7-12 (CATCGTCTTCTTCTTTCTCACATTCAT)<br>ATG7-TaqI* (GTCGACGGAAGTGTCAATGGAGCGAAT <u>C</u> )      |
| <i>atg7-5</i> | <i>DdeI</i>        | 146                | 117, 29        | ATG7-11 (CAGGGAACGCAAACCAATACCGAAAACCTC)<br>ATG7-DdeI* (TAACAATTTTGTGGTGAATTTTAGACTT)            |
| <i>atg7-6</i> | <i>Tsp45I</i>      | 107                | 78, 29         | ATG7-10 (CAACCCAATGTACCAGCTCCAAGAAGAAGG)<br>ATG7-Tsp45I* (GTCGATTTAACTTAAAGTTAATGAG <u>G</u> TG) |
| <i>atg7-7</i> | <i>HinfI</i>       | 87                 | 56, 31         | ATG7-HinfI* (TCAGTGCCAAGTAGTTTCGAAGTGCC <u>G</u> AG)<br>ATG7-22 (CGAATCAGTGCCAAGTAGTTTCGAAGTGA)  |
| <i>atg7-8</i> | <i>BclI</i>        | 250                | 174, 76        | ATG7-21 (TTTGTTAAGCTCCCATCCCACTGA)<br>ATG7-22 (CGAATCAGTGCCAAGTAGTTTCGAAGTGA)                    |
| <i>lon2-2</i> | –                  | none               | 248            | LB1-SALK (CAAACCAGCGTGGACCGCTTGCTGCAACTC)<br>R008 (TTACCATATGGGCCAACACAGTCC)                     |
| <i>LON2</i>   | –                  | 343                | none           | LON2-16 (AGTCTTGTCTCGGTATTGCATTGGGGGTAG)<br>R008 (TTACCATATGGGCCAACACAGTCC)                      |

\*The underlined nucleotide in this primer differs from the wild-type sequence to create the indicated restriction site in the mutant or wild-type PCR amplicon.

**Supplemental Table 3.** PCR-Based Markers Used in Recombination Mapping.

| Marker | Nearest Gene | Enzyme        | Amplicon Size (bp) |     | Primer Sequences (or reference)                                  |
|--------|--------------|---------------|--------------------|-----|------------------------------------------------------------------|
|        |              |               | Col-0              | Ler |                                                                  |
| K16E1  | At5g42590    | -             | 166                | 148 | F: GGTGTATCGTCATGTGTCTC<br>R: AACTACTAGTTCATTGTAAA               |
| PDC2   | At5g54950    | <i>Bam</i> HI | 360, 65            | 425 | (Konieczny and Ausubel, 1993)                                    |
| T2E22  | At3g12560    | -             | 84                 | 74  | F: ATGAGAAGCTATAATTTTTTCAATA<br>R: CTCATATATACAAAGAACTACTATAC    |
| MXL8   | At3g21215    | -             | 157                | 128 | F: GTAGCCCAAAGCCGTACAG<br>R: GAGATGCGTTTTCACCTACAA               |
| LCS341 | At3g23633    | <i>Hinf</i> I | 142, 30            | 172 | F: TTGTGCTTTTGCTTTTTAAAGCCGATT<br>R: AGTTTTTCTTCTTTTTGTATTTATGTG |
